# Supplementary material for: Effects of Caulerpa taxifolia on Physiological Processes and Gene Expression of Acropora hyacinthus during Thermal Stress
Source: MDPI journal article supplement (doi:10.3390/biology11121792), 2022-12-09
Supplement: s1 [file s1]

## Supplementary Material

**Table S1:** Summary of values of water chemistry data for all treatments. The results are presented as means  $\pm$  standard deviation.

| variable         | Coral          |                | Coral exposed to algae |              | Coral contact with algae |              |
|------------------|----------------|----------------|------------------------|--------------|--------------------------|--------------|
|                  | 27°C           | 30°C           | 27°C                   | 30°C         | 27°C                     | 30°C         |
| Temperature [°C] | 27.1 $\pm$ 0.1 | 30 $\pm$ 0.2   | 27.1 $\pm$ 0.1         | 30 $\pm$ 0.2 | 27.1 $\pm$ 0.1           | 30 $\pm$ 0.2 |
| PH               | 8.0 $\pm$ 0.03 | 8.0 $\pm$ 0.04 | 8.0 $\pm$ 0.03         | 8.0          | 8.0 $\pm$ 0.03           | 8.0          |
| Salinity         | 32.1 $\pm$ 0.4 | 32.1 $\pm$ 0.4 | 32.1 $\pm$ 0.4         | 32 $\pm$ 0.3 | 32 $\pm$ 0.3             | 32 $\pm$ 0.2 |

**Table S2:** qPCR Primer sequences

| Gene           | Primer sequence(5'-3')    | Size(bp) | Reference          |
|----------------|---------------------------|----------|--------------------|
| $\beta$ -Actin | F:ATGACAGAGGATGAGGGTAGAAA | 194      | Designed by author |
|                | R:GAGAAGAGGTCCCGACGAATA   |          |                    |
| SODC           | F: TGATACCAACCTGCCTCT     | 186      | Designed by author |
|                | R: TCGGTGAACTTGAAATAAC    |          |                    |
| CATE           | F: TGGAAACAATACGCCAATCT   | 124      | Designed by author |
|                | R: AGTGATGAAATCCCAGAACAT  |          |                    |
| CYP3A          | F: ATCGCCGCAGAAATCGTG     | 163      | Designed by author |
|                | R: CGTAGCCAGCCAATAGAAAG   |          |                    |
| HSP90          | F: GCTGTTTGCCGAAGTGAC     | 144      | Designed by author |
|                | R: GAGGCTGAAGAATGGTATCT   |          |                    |
| HSP40          | F: TGGTCAGATGCCAAGTCC     | 96       | Designed by author |
|                | R: CGGCTAAATACAGGGTGC     |          |                    |
| CalM           | F: ACCTCTTTCGTTTCGCTGAC   | 145      | Designed by author |
|                | R: CTCCTGAATCGCTGTTGCT    |          |                    |
| Casp8          | F: GCACAGCCTACGACATTG     | 108      | Designed by author |
|                | R: GACACGACCGTTTCATTCA    |          |                    |
| Casp7          | F: TTCAGTTCCTTGCGTTTA     | 175      | Designed by author |
|                | R: CCTCCCTTCCATCTACACC    |          |                    |
| ALG9           | F: TCGTTATGGCTCCAAGAATC   | 193      | Designed by author |
|                | R: ACCGTCGTGAGAACAGTTTC   |          |                    |
| Galaxin        | F: CGATGCCACCCTTTCCC      | 137      | Designed by author |
|                | R: CTGGTACGCCTACAGGTTTGT  |          |                    |
| GPX            | F: GAATCATCTCGCCACCTGAC   | 96       | Designed by author |
|                | R: GCATACTTCGGAGCCTACTGA  |          |                    |
| ATG5           | ACTGTAAACCGACGCCTGAT      | 173      | Designed by author |
|                | GGAACAAACTCCCGAACA        |          |                    |

**Table S3:** Data of various physiological indicators, the results are presented as means  $\pm$  standard deviation. The results are presented as means  $\pm$  standard deviation.

| Variable                 |       | Zooxanthellae×10 <sup>6</sup> (cell cm <sup>-2</sup> ) |       |             |         |       |       |             |         |
|--------------------------|-------|--------------------------------------------------------|-------|-------------|---------|-------|-------|-------------|---------|
|                          |       | 27°C                                                   |       |             | Mean±sd | 30°C  |       |             | Mean±sd |
| Coral                    | 0.29  | 0.33                                                   | 0.32  | 0.32±0.02   | 0.03    | 0.06  | 0.06  | 0.05±0.02   |         |
| Coral exposed to algae   | 0.24  | 0.11                                                   | 0.11  | 0.15±0.07   | 0.07    | 0.21  | 0.18  | 0.15±0.07   |         |
| Coral contact with algae | 0.15  | 0.22                                                   | 0.36  | 0.24±0.11   | 0.12    | 0.28  | 0.28  | 0.23±0.09   |         |
|                          |       | Chl <i>a</i> (µg cm <sup>-2</sup> )                    |       |             |         |       |       |             |         |
|                          |       | 27°C                                                   |       |             | Mean±sd | 30°C  |       |             | Mean±sd |
| Coral                    | 5.3   | 4.1                                                    | 6.7   | 5.34±1.3    | 0.25    | 0.47  | 0.27  | 0.33±0.12   |         |
| Coral exposed to algae   | 1.8   | 1.8                                                    | 1.1   | 1.54±0.4    | 0.29    | 3.47  | 3.35  | 2.37±1.8    |         |
| Coral contact with algae | 3.8   | 2.5                                                    | 4.0   | 3.43±0.8    | 1.28    | 4.89  | 1.31  | 2.47±2.1    |         |
|                          |       | Protein (mg cm <sup>-2</sup> )                         |       |             |         |       |       |             |         |
|                          |       | 27°C                                                   |       |             | Mean±sd | 30°C  |       |             | Mean±sd |
| Coral                    | 1.17  | 0.72                                                   | 0.59  | 0.83±0.3    | 0.33    | 0.31  | 0.48  | 0.37±0.09   |         |
| Coral exposed to algae   | 0.54  | 0.71                                                   | 0.29  | 0.52±0.21   | 0.38    | 0.64  | 0.75  | 0.59±0.19   |         |
| Coral contact with algae | 0.78  | 0.39                                                   | 0.42  | 0.53±0.22   | 0.44    | 0.49  | 0.35  | 0.43±0.07   |         |
|                          |       | Growth Rate (mg cm <sup>-2</sup> d <sup>-1</sup> )     |       |             |         |       |       |             |         |
|                          |       | 27°C                                                   |       |             | Mean±sd | 30°C  |       |             | Mean±sd |
| Coral                    | 0.45  | 1.06                                                   | 1.74  | 1.09±0.64   | 0.51    | 1.2   | 0.79  | 0.83±0.22   |         |
| Coral exposed to algae   | 1.13  | 0.42                                                   | 0.73  | 0.76±0.35   | 0.56    | 1.5   | 0.46  | 0.84±0.58   |         |
| Coral contact with algae | 0.97  | 0.77                                                   | 0.53  | 0.76±0.22   | 0.41    | 0.49  | 0.61  | 0.5±0.1     |         |
|                          |       | SOD (U mgprot <sup>-1</sup> )                          |       |             |         |       |       |             |         |
|                          |       | 27°C                                                   |       |             | Mean±sd | 30°C  |       |             | Mean±sd |
| Coral                    | 149.1 | 231.1                                                  | 241.6 | 207.3±50.6  | 426.9   | 635.4 | 341.3 | 467.8±151.3 |         |
| Coral exposed to algae   | 316.8 | 282.3                                                  | 515.3 | 371.5±125.8 | 213     | 288.4 | 227.7 | 243±40      |         |
| Coral contact with algae | 501.1 | 417.3                                                  | 261.3 | 393.3±121.7 | 282.7   | 273.3 | 286.8 | 280.9±7     |         |
|                          |       | CAT (U mgprot <sup>-1</sup> )                          |       |             |         |       |       |             |         |
|                          |       | 27°C                                                   |       |             | Mean±sd | 30°C  |       |             | Mean±sd |
| Coral                    | 3.76  | 8.92                                                   | 12.64 | 8.44±4.46   | 27.01   | 17.34 | 33.18 | 25.84±7.99  |         |
| Coral exposed to algae   | 6.14  | 12.49                                                  | 25.71 | 14.78±9.98  | 51.01   | 41.34 | 43.29 | 45.21±5.11  |         |
| Coral contact with algae | 48.54 | 53.79                                                  | 51.73 | 51.35±2.64  | 14.46   | 24.4  | 25.03 | 21.3±5.93   |         |

|         |             |             |                  |                            |
|---------|-------------|-------------|------------------|----------------------------|
|         |             | Interaction | F(2,8) =<br>10.8 | <b>&lt;0.0</b><br><b>1</b> |
| Protein | Algae       |             | F(2,8) = 0.8     | 0.46                       |
|         | Temperature |             | F(1,4) = 1.8     | 0.25                       |
|         | Interaction |             | F(2,8) = 4.3     | 0.05                       |
| SOD     | Algae       |             | F(2,8) =<br>0.17 | 0.86                       |
|         | Temperature |             | F(1,4) =<br>0.03 | 0.86                       |
|         | Interaction |             | F(2,8) = 6.3     | <b>0.02</b>                |
| CAT     | Algae       |             | F(2,8) =<br>16.4 | <b>&lt;0.0</b><br><b>1</b> |
|         | Temperature |             | F(1,4) = 2.8     | 0.17                       |
|         | Interaction |             | F(2,8) =<br>43.5 | <b>&lt;0.0</b><br><b>1</b> |

**Table S5:** Statistics summary of RNA-Seq of *A. hyacinthus*

| Samples | Clean reads | Mapped reads | Comparison rate | Q30   | GC content |
|---------|-------------|--------------|-----------------|-------|------------|
| LD      | 21 476 650  | 14 574 005   | 67.9%           | 96%   | 46.1%      |
| LH      | 20 347 432  | 13 261 939   | 65.2%           | 94.6% | 46.5%      |
| LM      | 20 993 422  | 13 807 161   | 65.8%           | 94.4% | 47.1%      |
| HD      | 21 290 828  | 14 314 966   | 67.3%           | 95.9% | 43.9%      |
| HH      | 21 142 687  | 14 068 385   | 66.6%           | 95.9% | 46.4%      |
| HM      | 21 336 087  | 14 179 496   | 66.5%           | 96%   | 45.5%      |
| Total   | 126 587 106 |              |                 |       |            |

Notes: Q30 represent 0.1% probabilities of base error, respectively

**Table S6:** DEGs statistics in all treatments. Select FDR < 0.001 and shown as LH, LM and HD groups vs LD group, HH and HM groups vs HD group.

| DEGs           | LH groups | LM groups | HD groups | HH groups | HM groups |
|----------------|-----------|-----------|-----------|-----------|-----------|
| Up-regulated   | 5 621     | 5 313     | 1 590     | 16        | 15        |
| Down-regulated | 6 413     | 7 160     | 11        | 2 861     | 313       |

**Table S7:** FPKM expression map of different biological processes regulated by DEGs. The results are presented as means ± standard deviation.

| DEGs   | LD groups | LH groups | LM groups | HD groups | HH groups | HM groups |
|--------|-----------|-----------|-----------|-----------|-----------|-----------|
| Rab5   | 75.3±7.5  | 10.6±0.3  | 13.1±4.9  | 91.8±18.9 | 74.5±5.5  | 64.4±36.8 |
| Rab10  | 0.5±0.1   | 42.7±6.8  | 32.7±6.5  | 0.6±0.5   | 0.5±0.2   | 16.9±28.6 |
| Rab22  | 54±8.8    | 0.7±0.2   | 0.6±0.2   | 66.5±4.2  | 52.4±13.3 | 41.1±34.0 |
| Rab11A | 13.3±3.2  | 79.1±6.0  | 58.9±7.1  | 12.9±0.6  | 8.9±3.1   | 44.3±51.4 |
| ATG5   | 0.2±0.1   | 12.5±2.4  | 10.7±2.7  | 0.4±0.1   | 0.2±0.1   | 3.8±6.0   |
| ATG10  | 17.4±11.4 | 0.8±0.2   | 1.3±0.1   | 8.6±4.9   | 16.5±15.2 | 10.1±8.9  |
| CalM   | 71.2±7.8  | 3.9±0.6   | 2.7±0.3   | 97.7±6.4  | 54.7±10.0 | 54.3±43.8 |

|          |           |           |           |            |           |           |
|----------|-----------|-----------|-----------|------------|-----------|-----------|
| Galaxin  | 5.9±1.2   | 0.9±0.8   | 0.7±0.9   | 48.5±10.0  | 9.4±12.0  | 11.1±12.5 |
| SODC     | 38.4±17.4 | 8.8±12.2  | 20.1±1.1  | 107.2±34.8 | 33.5±14.0 | 24.1±19.4 |
| CAT      | 4.6±1.9   | 12.8±2.0  | 14.0±4.1  | 11.3±4.2   | 11.7±9.1  | 23.6±19.0 |
| GPX      | 0.9±0.1   | 0.04±0.08 | 0.03±0.05 | 1.5±0.6    | 0.6±0.1   | 0.4±0.2   |
| Hsp70    | 16.8±5.8  | 3.8±0.6   | 3.3±1.1   | 26.3±5.4   | 11.8±3.5  | 10.7±4.3  |
| HSP40    | 7.2±0.72  | 27.2±8.4  | 20.8±4.9  | 11.2±1.0   | 7.5±1.2   | 14.6±10.1 |
| CYP3A    | 9.5±1.9   | 0.1±0.1   | 0.2±0.2   | 20.9±3.1   | 12.3±2.5  | 7.6±6.6   |
| TNFRSF14 | 3.1±3.0   | 0.7±0.1   | 0.4±0.2   | 8.7±5.3    | 2.8±3.4   | 1.4±0.8   |
| TLR2     | 2.6±0.1   | 10.4±2.6  | 13.3±0.7  | 6.1±1.6    | 2.7±1.3   | 8.3±7.9   |
| TRAF3    | 5.3±2.0   | 0.3±0.2   | 0.2±0.2   | 19.0±1.5   | 2.5±2.3   | 7.3±7.6   |
| IFI47    | 3.2±0.2   | 3.3±0.1   | 4.4±0.9   | 15.1±9.5   | 3.4±0.5   | 5.5±1.2   |
| TRAF5    | 2.9±2.9   | 0.9±1.0   | 0.8±0.8   | 9.1±7.1    | 0.9±0.2   | 5.4±7.7   |
| MYD88    | 18.3±4.4  | 2.1±0.1   | 1.3±0.4   | 38.7±5.1   | 19.1±7.2  | 17.7±13.4 |
| Casp3    | 0.3±0.1   | 10.0±0.8  | 9.7±0.6   | 1.2±0.6    | 0.3±0.1   | 5.4±8.2   |
| Casp8    | 20.7±1.9  | 3.0±1.0   | 0.9±1.5   | 25.6±1.3   | 18.9±5.7  | 15.9±11.3 |
| Casp7    | 4.3±1.0   | 11.0±3.0  | 5.0±3.3   | 9.9±3.5    | 4.4±1.6   | 9.1±5.7   |
| FADD     | 7.8±1.7   | 5.0±0.7   | 4.7±0.7   | 11.5±0.7   | 7.0±1.5   | 7.1±1.5   |
| HIRA2    | 1.1±0.4   | 9.9±2.3   | 8.1±1.6   | 1.6±0.2    | 0.75±0.3  | 4.9±6.7   |

**Table S8:** The log<sub>2</sub>FoldChange value of qRT-PCR and RNA-seq. Compared with LD group, DEGs verification of LH, LM and HD groups . And compared with HD group, the DEGs verification of HH and HM. The results are presented as means ± standard deviation.

| Group | DEGs    | qRT-PCR  | RNA-seq |
|-------|---------|----------|---------|
| LH    | Casp8   | -1.4±1.2 | -2.9    |
|       | Casp7   | 1.1±0.6  | 1.3     |
|       | CYP3A   | -2.0±2.9 | -3.3    |
|       | ATG5    | 3.1±0.5  | 5.9     |
| LM    | Casp8   | -1.6±0.4 | -6.3    |
|       | Hsp90   | -1.1±0.3 | -1.3    |
|       | ATG5    | 3.2±0.4  | 5.5     |
| HD    | CAT     | 0.6±0.6  | 2.3     |
|       | SODC    | 2.3±0.7  | 2.5     |
|       | CYP3A   | 1.3±0.9  | 2.1     |
|       | CalM    | 1.2±0.7  | 1.9     |
|       | Galaxin | 5±0.8    | 3.9     |
|       | Casp7   | 3.5±0.4  | 2.2     |
| HH    | SODC    | -2.9±0.4 | -3.0    |
|       | CYP3A   | -1.8±0.2 | -2.0    |
|       | Hsp40   | -1.6±1.1 | -2.0    |
|       | CalM    | -1.6±0.7 | -2.1    |
|       | CASP7   | -3.2±1.2 | -2.7    |
| HM    | ALG9    | -1.3±0.4 | -3.0    |
|       | CalM    | -1.6±0.7 | -2.1    |
|       | GPX     | -1.6±2.4 | -2.8    |

**Table. S9:** Distribution of gene ontologies which were significantly enriched in KEGG pathways of LH , LM, HD, HH and HM treatments. The difference groups selected as LH, LM and HD compared with LD, HH and HM compared with HD.

| Group | Pathway                                                    | ko ID   | DEGs in Pathway | All gene in Pathway | P-value |
|-------|------------------------------------------------------------|---------|-----------------|---------------------|---------|
| LH    | FoxO signaling pathway                                     | ko04068 | 102             | 193                 | <0.01   |
|       | Inositol phosphate metabolism                              | ko00562 | 71              | 140                 | <0.01   |
|       | mTOR signaling pathway                                     | ko04150 | 139             | 311                 | <0.01   |
|       | Endocytosis                                                | ko04144 | 210             | 491                 | <0.01   |
|       | Autophagy - animal                                         | ko04140 | 164             | 375                 | <0.01   |
|       | Apoptosis - multiple species                               | ko04215 | 39              | 72                  | <0.01   |
|       | Various types of N-glycan biosynthesis                     | ko00513 | 48              | 96                  | <0.01   |
|       | Glycosphingolipid biosynthesis - lacto and neolacto series | ko00601 | 14              | 21                  | <0.01   |
|       | Glycosaminoglycan biosynthesis - keratan sulfate           | ko00533 | 7               | 8                   | <0.01   |
|       | Neuroactive ligand-receptor interaction                    | ko04080 | 103             | 233                 | <0.01   |
|       | Other glycan degradation                                   | ko00511 | 27              | 50                  | <0.01   |
|       | beta-Alanine metabolism                                    | ko00410 | 42              | 85                  | <0.01   |
|       | Glycosaminoglycan degradation                              | ko00531 | 33              | 64                  | <0.01   |
|       | Cell adhesion molecules                                    | ko04514 | 14              | 22                  | <0.01   |
|       | TGF-beta signaling pathway                                 | ko04350 | 50              | 105                 | <0.01   |
|       | Other types of O-glycan biosynthesis                       | ko00514 | 28              | 54                  | 0.01    |
|       | Lysine degradation                                         | ko00310 | 64              | 142                 | 0.01    |
|       | Notch signaling pathway                                    | ko04330 | 54              | 118                 | 0.02    |
|       | Mannose type O-glycan biosynthesis                         | ko00515 | 15              | 27                  | 0.03    |
|       | Wnt signaling pathway                                      | ko04310 | 115             | 278                 | 0.03    |
| LM    | mTOR signaling pathway                                     | ko04150 | 151             | 311                 | <0.01   |
|       | Autophagy - animal                                         | ko04140 | 176             | 375                 | <0.01   |
|       | Glycosaminoglycan degradation                              | ko00531 | 39              | 64                  | <0.01   |
|       | FoxO signaling pathway                                     | ko04068 | 97              | 193                 | <0.01   |
|       | TGF-beta signaling pathway                                 | ko04350 | 55              | 105                 | <0.01   |
|       | Inositol phosphate metabolism                              | ko00562 | 69              | 140                 | <0.01   |
|       | Endocytosis                                                | ko04144 | 213             | 491                 | <0.01   |
|       | Neuroactive ligand-receptor interaction                    | ko04080 | 107             | 233                 | <0.01   |
|       | Glycosaminoglycan biosynthesis - keratan sulfate           | ko00533 | 7               | 8                   | <0.01   |
|       | Apoptosis - multiple species                               | ko04215 | 38              | 72                  | <0.01   |
|       | Glycosphingolipid biosynthesis - lacto and neolacto series | ko00601 | 14              | 21                  | <0.01   |
|       | Various types of N-glycan                                  | ko00513 | 48              | 96                  | <0.01   |

|    |                                                               |         |     |     |       |
|----|---------------------------------------------------------------|---------|-----|-----|-------|
|    | biosynthesis                                                  |         |     |     |       |
|    | Other types of O-glycan biosynthesis                          | ko00514 | 29  | 54  | 0.01  |
|    | Cell adhesion molecules                                       | ko04514 | 14  | 22  | 0.01  |
|    | ECM-receptor interaction                                      | ko04512 | 67  | 144 | 0.02  |
|    | Other glycan degradation                                      | ko00511 | 26  | 50  | 0.03  |
|    | Glycosaminoglycan biosynthesis -<br>heparan sulfate / heparin | ko00534 | 19  | 35  | 0.03  |
|    | Wnt signaling pathway                                         | ko04310 | 119 | 278 | 0.04  |
|    | Mannose type O-glycan biosynthesis                            | ko00515 | 15  | 27  | 0.04  |
|    | Lysosome                                                      | ko04142 | 182 | 440 | 0.05  |
| HD | ErbB signaling pathway                                        | ko04012 | 7   | 19  | <0.01 |
|    | Cytosolic DNA-sensing pathway                                 | ko04623 | 5   | 20  | <0.01 |
|    | TNF signaling pathway                                         | ko04668 | 5   | 22  | <0.01 |
|    | Cell adhesion molecules                                       | ko04514 | 5   | 22  | <0.01 |
|    | Herpes simplex virus 1 infection                              | ko05168 | 11  | 107 | 0.01  |
|    | Toll-like receptor signaling pathway                          | ko04620 | 5   | 36  | 0.02  |
|    | Inositol phosphate metabolism                                 | ko00562 | 12  | 140 | 0.03  |
|    | MAPK signaling pathway                                        | ko04010 | 9   | 95  | 0.03  |
|    | FoxO signaling pathway                                        | ko04068 | 15  | 193 | 0.04  |
|    | Phenylalanine metabolism                                      | ko00360 | 5   | 41  | 0.04  |
|    | Glyoxylate and dicarboxylate<br>metabolism                    | ko00630 | 10  | 115 | 0.04  |
|    | Tryptophan metabolism                                         | ko00380 | 10  | 121 | >0.05 |
|    | Glycosaminoglycan degradation                                 | ko00531 | 6   | 64  | >0.05 |
|    | Phosphatidylinositol signaling<br>system                      | ko04070 | 16  | 238 | >0.05 |
|    | Ubiquitin mediated proteolysis                                | ko04120 | 23  | 367 | >0.05 |
|    | Ether lipid metabolism                                        | ko00565 | 5   | 52  | >0.05 |
|    | Butanoate metabolism                                          | ko00650 | 5   | 54  | >0.05 |
|    | N-Glycan biosynthesis                                         | ko00510 | 6   | 70  | >0.05 |
|    | Autophagy - animal                                            | ko04140 | 23  | 375 | >0.05 |
|    | Protein processing in endoplasmic<br>reticulum                | ko04141 | 28  | 472 | >0.05 |
| HH | Endocytosis                                                   | ko04144 | 67  | 491 | <0.01 |
|    | TNF signaling pathway                                         | ko04668 | 7   | 22  | <0.01 |
|    | NOD-like receptor signaling<br>pathway                        | ko04621 | 17  | 93  | <0.01 |
|    | Apoptosis - multiple species                                  | ko04215 | 14  | 72  | <0.01 |
|    | ErbB signaling pathway                                        | ko04012 | 6   | 19  | <0.01 |
|    | Vitamin digestion and absorption                              | ko04977 | 3   | 5   | <0.01 |
|    | Cell adhesion molecules                                       | ko04514 | 6   | 22  | 0.01  |
|    | Lysosome                                                      | ko04142 | 53  | 440 | 0.01  |
|    | Ether lipid metabolism                                        | ko00565 | 10  | 52  | 0.01  |
|    | Sulfur relay system                                           | ko04122 | 4   | 13  | 0.02  |

|    |                                                               |         |    |     |       |
|----|---------------------------------------------------------------|---------|----|-----|-------|
|    | Glycosaminoglycan biosynthesis -<br>heparan sulfate / heparin | ko00534 | 7  | 35  | 0.03  |
|    | Basal transcription factors                                   | ko03022 | 10 | 59  | 0.03  |
|    | Glycerophospholipid metabolism                                | ko00564 | 20 | 151 | 0.04  |
|    | ECM-receptor interaction                                      | ko04512 | 19 | 144 | 0.049 |
|    | Phosphonate and phosphinate<br>metabolism                     | ko00440 | 4  | 18  | >0.05 |
|    | MAPK signaling pathway                                        | ko04010 | 13 | 95  | >0.05 |
|    | FoxO signaling pathway                                        | ko04068 | 23 | 193 | >0.05 |
|    | N-Glycan biosynthesis                                         | ko00510 | 10 | 70  | >0.05 |
|    | Amino sugar and nucleotide sugar<br>metabolism                | ko00520 | 15 | 117 | >0.05 |
|    | Toll-like receptor signaling pathway                          | ko04620 | 6  | 36  | >0.05 |
|    | Neuroactive ligand-receptor<br>interaction                    | ko04080 | 5  | 233 | 0.02  |
|    | Cytokine-cytokine receptor<br>interaction                     | ko04060 | 1  | 8   | 0.049 |
|    | Arachidonic acid metabolism                                   | ko00590 | 3  | 140 | >0.05 |
|    | Apoptosis - multiple species                                  | ko04215 | 2  | 72  | >0.05 |
|    | Glutathione metabolism                                        | ko00480 | 3  | 182 | >0.05 |
|    | Herpes simplex virus 1 infection                              | ko05168 | 2  | 107 | >0.05 |
|    | Phenylalanine, tyrosine and<br>tryptophan biosynthesis        | ko00400 | 1  | 26  | >0.05 |
|    | Vitamin B6 metabolism                                         | ko00750 | 1  | 26  | >0.05 |
| HM | Taurine and hypotaurine metabolism                            | ko00430 | 1  | 27  | >0.05 |
|    | Pyrimidine metabolism                                         | ko00240 | 2  | 114 | >0.05 |
|    | Influenza A                                                   | ko05164 | 1  | 28  | >0.05 |
|    | Ubiquinone and other<br>terpenoid-quinone biosynthesis        | ko00130 | 1  | 28  | >0.05 |
|    | Notch signaling pathway                                       | ko04330 | 2  | 118 | >0.05 |
|    | Peroxisome                                                    | ko04146 | 3  | 263 | >0.05 |
|    | Phenylalanine metabolism                                      | ko00360 | 1  | 41  | >0.05 |
|    | ECM-receptor interaction                                      | ko04512 | 2  | 144 | >0.05 |
|    | Nucleotide excision repair                                    | ko03420 | 2  | 145 | >0.05 |
|    | Riboflavin metabolism                                         | ko00740 | 1  | 42  | >0.05 |
|    | Purine metabolism                                             | ko00230 | 3  | 278 | >0.05 |
|    | Thiamine metabolism                                           | ko00730 | 1  | 49  | >0.05 |
